# Supplementary material
Source: PubMed Central journal article supplement (PMC8643453)

# **Global epidemiology and socioeconomic development correlates of the reproductive ratio of SARS-CoV-2**

**Authors:** Lutz P. Breitling

## **Supplementary Materials**

Supplemental Table S1      page 2

Supplemental Table S2      page 3

Supplemental Figure S1      page 4

Supplemental Figure S2      page 5

Supplemental Figure S3      page 6

**Supplemental Table S1.** Regression models estimating the time trend of COVID-19  $\log(R_t)$  using the a priori selected time-lag of 21 days for controlling for the effect of country-wide interventions as recorded by the Oxford COVID-19 Government Response Tracker.

| Intervention                                                                                    | Estimated coefficient (95% confidence interval) |                              | Intervention              | Fold-change in $R_t$ for intervention |
|-------------------------------------------------------------------------------------------------|-------------------------------------------------|------------------------------|---------------------------|---------------------------------------|
|                                                                                                 | Day                                             | Day <sup>2</sup>             |                           |                                       |
| None                                                                                            | -0.035 (-0.039 to -0.031)                       | 0.00024 (0.00021 to 0.00028) | not applicable            | not applicable                        |
| School closing (require closing of at least some levels or categories of schools)               | -0.034 (-0.039 to -0.030)                       | 0.00024 (0.00020 to 0.00027) | -0.051 (-0.094 to -0.008) | 0,950                                 |
| Workplace closing (require closing for at least some sectors or categories of workers)          | -0.035 (-0.039 to -0.030)                       | 0.00024 (0.00020 to 0.00028) | -0.042 (-0.077 to -0.007) | 0,959                                 |
| Cancel public events (require cancelling)                                                       | -0.034 (-0.038 to -0.030)                       | 0.00024 (0.00020 to 0.00027) | -0.073 (-0.116 to -0.029) | 0,930                                 |
| Restrictions on gatherings (restrictions on gatherings of 1000 people or stricter restrictions) | -0.034 (-0.038 to -0.030)                       | 0.00024 (0.00020 to 0.00027) | -0.063 (-0.102 to -0.025) | 0,939                                 |
| Close public transport (require closing or prohibiting most citizens from using it)             | -0.035 (-0.039 to -0.031)                       | 0.00024 (0.00021 to 0.00028) | -0.014 (-0.064 to 0.037)  | 0,987                                 |
| Stay at home requirements (require not leaving house with limited exceptions)                   | -0.035 (-0.039 to -0.030)                       | 0.00024 (0.00020 to 0.00028) | -0.051 (-0.086 to -0.016) | 0,951                                 |
| Restrictions on internal movement in place                                                      | -0.035 (-0.039 to -0.031)                       | 0.00024 (0.00021 to 0.00028) | -0.011 (-0.048 to 0.025)  | 0,989                                 |
| Any of the interventions above                                                                  | -0.034 (-0.038 to -0.030)                       | 0.00023 (0.00020 to 0.00027) | -0.091 (-0.137 to -0.044) | 0,913                                 |
| Comprehensive contact tracing                                                                   | -0.035 (-0.039 to -0.031)                       | 0.00024 (0.00021 to 0.00028) | -0.047 (-0.102 to 0.007)  | 0,954                                 |
| <b>Sensitivity models*</b>                                                                      |                                                 |                              |                           |                                       |
| None                                                                                            | -0.026 (-0.030 to -0.022)                       | 0.00018 (0.00015 to 0.00022) | not applicable            | not applicable                        |
| School closing                                                                                  | -0.025 (-0.029 to -0.021)                       | 0.00018 (0.00014 to 0.00021) | -0.062 (-0.107 to -0.016) | 0,940                                 |
| Workplace closing                                                                               | -0.025 (-0.029 to -0.021)                       | 0.00018 (0.00014 to 0.00022) | -0.045 (-0.081 to -0.008) | 0,956                                 |
| Cancel public events                                                                            | -0.025 (-0.029 to -0.021)                       | 0.00017 (0.00014 to 0.00021) | -0.091 (-0.138 to -0.043) | 0,913                                 |
| Restrictions on gatherings                                                                      | -0.025 (-0.029 to -0.021)                       | 0.00018 (0.00014 to 0.00021) | -0.057 (-0.097 to -0.017) | 0,945                                 |
| Close public transport                                                                          | -0.025 (-0.029 to -0.021)                       | 0.00018 (0.00014 to 0.00022) | -0.045 (-0.097 to 0.006)  | 0,956                                 |
| Stay at home                                                                                    | -0.025 (-0.029 to -0.021)                       | 0.00018 (0.00014 to 0.00022) | -0.029 (-0.064 to 0.005)  | 0,971                                 |
| Restrictions on movement                                                                        | -0.026 (-0.030 to -0.022)                       | 0.00018 (0.00015 to 0.00022) | 0.010 (-0.025 to 0.046)   | 1,010                                 |
| Any of the interventions above                                                                  | -0.025 (-0.029 to -0.021)                       | 0.00017 (0.00014 to 0.00021) | -0.099 (-0.149 to -0.048) | 0,906                                 |
| Comprehensive contact tracing                                                                   | -0.026 (-0.030 to -0.022)                       | 0.00018 (0.00015 to 0.00022) | 0.022 (-0.034 to 0.078)   | 1,023                                 |

\* For sensitivity analyses, the robustness criteria were defined as at least 2000 confirmed cases, at least 250 cases in the last week, and no drop to 100 cases per week or less.

**Supplemental Table S2.** Association of country-level development indicators with COVID-19 seven-day reproductive ratio ( $R_e$ ) estimated in mixed linear regression models of  $\log(R_e)$  with country as random effect, adjusted for non-significant linear and cubic time-trends. The reported RR fold-change was calculated by exponentiating the regression coefficient of the highest versus lowest tertile of each indicator. Shown are the results of sensitivity analysis models including all data from the 14<sup>th</sup> or 42<sup>nd</sup> robust day on.

| Development indicator                                                                                       | $R_e$ fold-change<br>(95% confidence interval) | $R_e$ fold-change<br>(95% confidence interval) |
|-------------------------------------------------------------------------------------------------------------|------------------------------------------------|------------------------------------------------|
|                                                                                                             | <i>from 14<sup>th</sup> robust day</i>         | <i>from 42<sup>nd</sup> robust day</i>         |
| Gross domestic product per capita                                                                           | 0.97 (0.88-1.08)                               | 0.89 (0.79-1.00)                               |
| Population density                                                                                          | 1.00 (0.90-1.10)                               | 0.92 (0.82-1.02)                               |
| Average household size                                                                                      | 1.09 (0.98-1.21)                               | 1.12 (1.10-1.38)                               |
| Median age                                                                                                  | 0.93 (0.83-1.03)                               | 0.88 (0.78-0.99)                               |
| Proportion age >65 years                                                                                    | 0.92 (0.83-1.02)                               | 0.87 (0.78-0.98)                               |
| Life expectancy                                                                                             | 0.93 (0.84-1.04)                               | 0.87 (0.77-0.97)                               |
| Health expenditures (dollar per capita)                                                                     | 0.93 (0.84-1.03)                               | 0.86 (0.76-0.97)                               |
| Physicians per population                                                                                   | 0.93 (0.84-1.04)                               | 0.89 (0.79-0.99)                               |
| Disability-adjusted life years lost due to any (rate)                                                       | 1.01 (0.91-1.12)                               | 1.06 (0.95-1.18)                               |
| Disability-adjusted life years lost due to communicable, maternal, neonatal, and nutritional disease (rate) | 1.08 (0.98-1.20)                               | 1.16 (1.04-1.30)                               |
| Disability-adjusted life years lost due to non-communicable disease (rate)                                  | 0.93 (0.84-1.03)                               | 0.88 (0.79-0.98)                               |
| Total fertility rate                                                                                        | 1.09 (0.98-1.20)                               | 1.14 (1.02-1.28)                               |
| Extreme poverty prevalence                                                                                  | 1.13 (1.00-1.29)                               | 1.23 (1.06-1.43)                               |
| Child malnutrition prevalence                                                                               | 0.97 (0.86-1.11)                               | 1.00 (0.85-1.17)                               |
| Under 5 mortality rate                                                                                      | 1.05 (0.95-1.17)                               | 1.13 (1.01-1.27)                               |
| Maternal mortality ratio                                                                                    | 1.03 (0.93-1.14)                               | 1.10 (0.98-1.24)                               |
| World Bank GINI coefficient                                                                                 | 1.14 (1.03-1.27)                               | 1.23 (1.10-1.38)                               |

**Supplemental Figure S1.** Distribution of the empirical reproductive ratio ( $R_e$ ) of COVID-19 in the first months of the pandemic in 174 countries by calendar date.

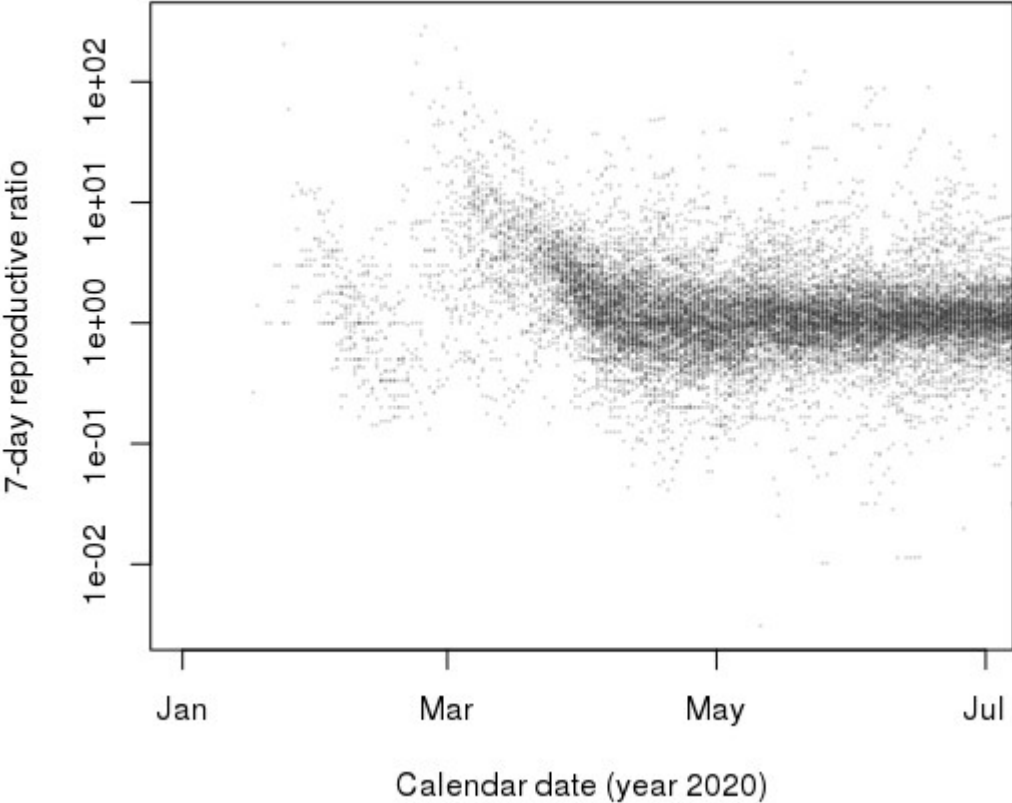

**Supplemental Figure S2.** P-values for the effect of country-wide physical distancing interventions or comprehensive contact tracing on the COVID-19  $\log(R_e)$  as estimated in mixed linear regression models, by intervention time lag. The triangle marks the 21 days lag a priori considered most plausible to allow for the times from infection to detection to reporting.

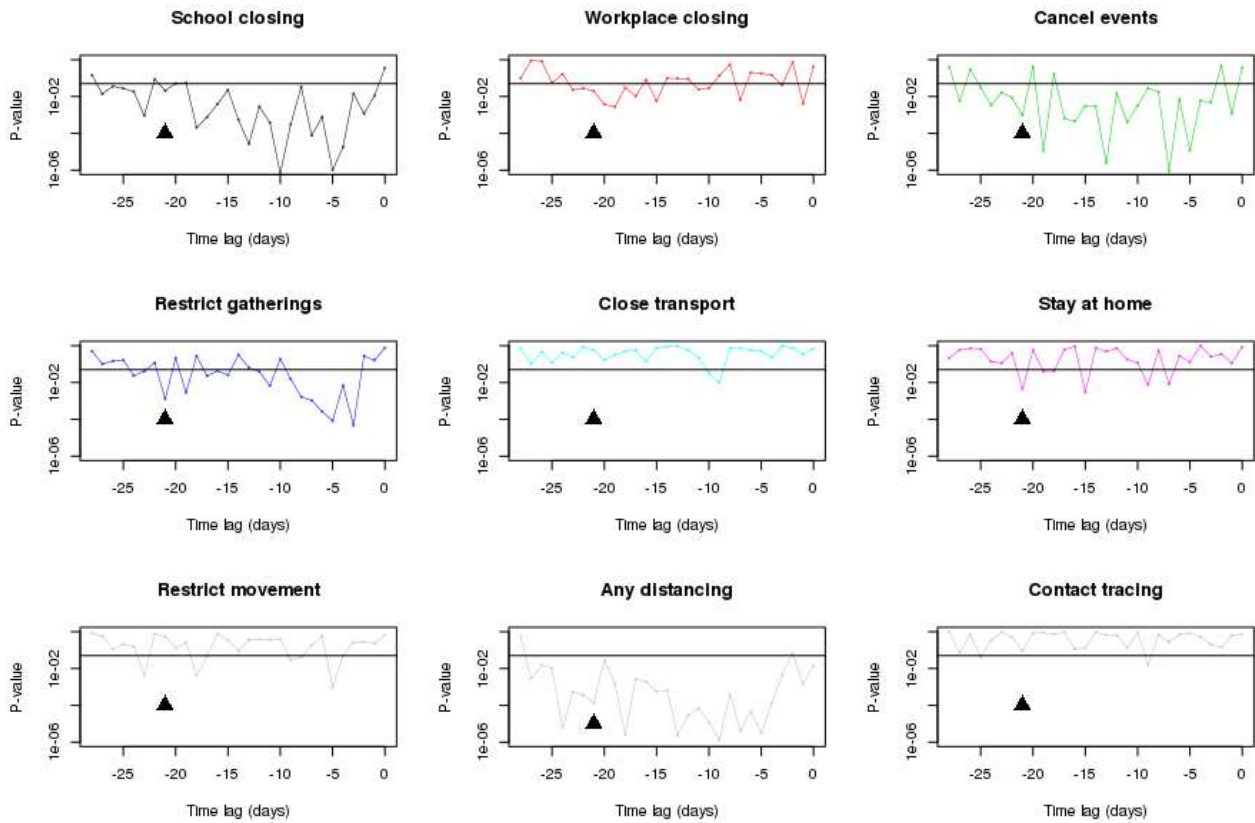

**Supplemental Figure S3.** Timing of the implementation of countrywide physical distancing interventions or comprehensive contact tracing (black dots mark the first day of the general countrywide implementation of the respective intervention in individual countries; overlaying the  $R_e$  of the robust dataset analysed).

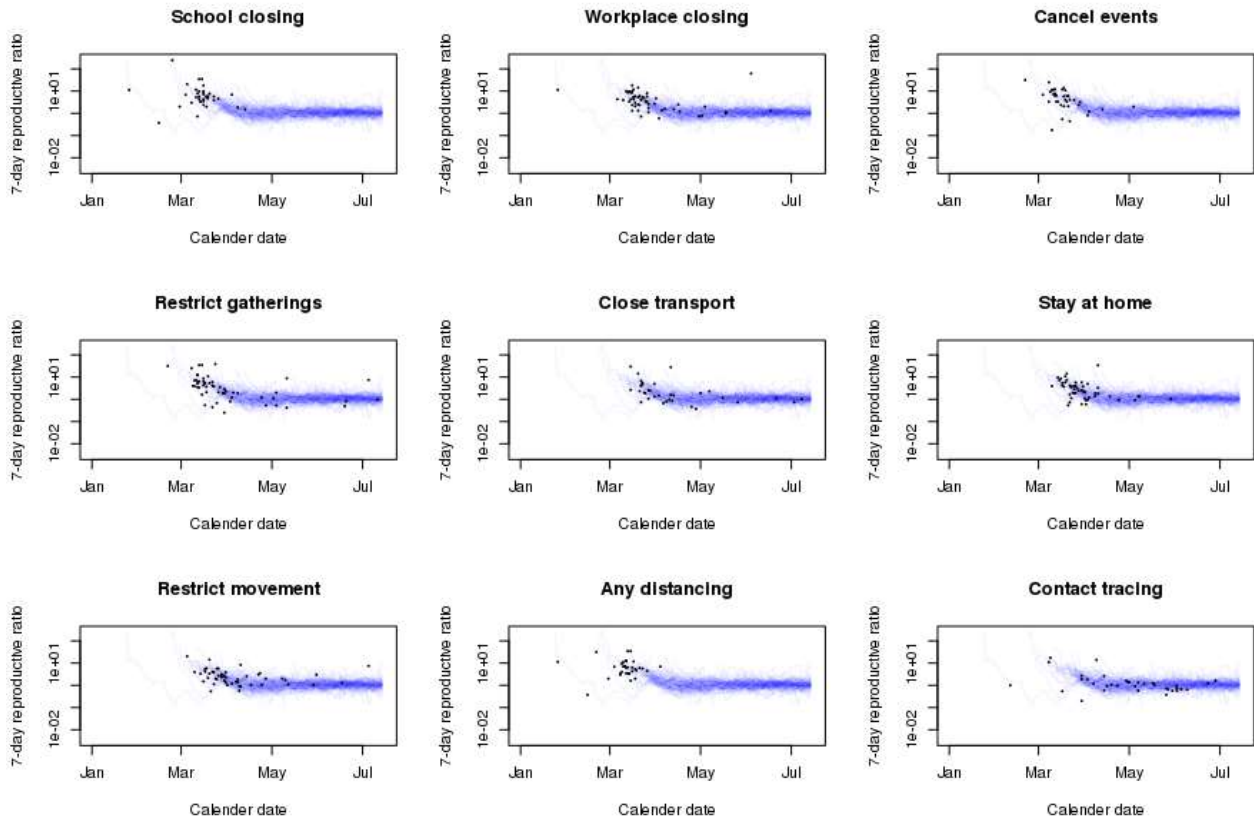

Supplement: ihab006_supplemental_file.pdf [file ihab006_supplemental_file.pdf]
